# Supplementary material
Source: PubMed Central journal article supplement (PMC1383509)

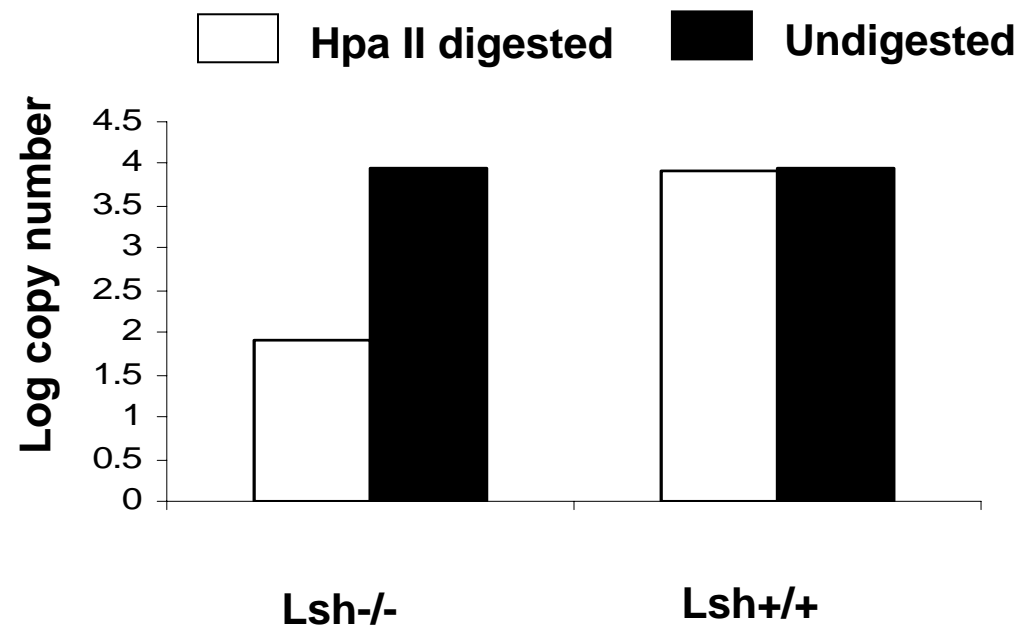

**Suppl. Fig. 1**

Supplement: 7600925s1.pdf [file 7600925s1.pdf]

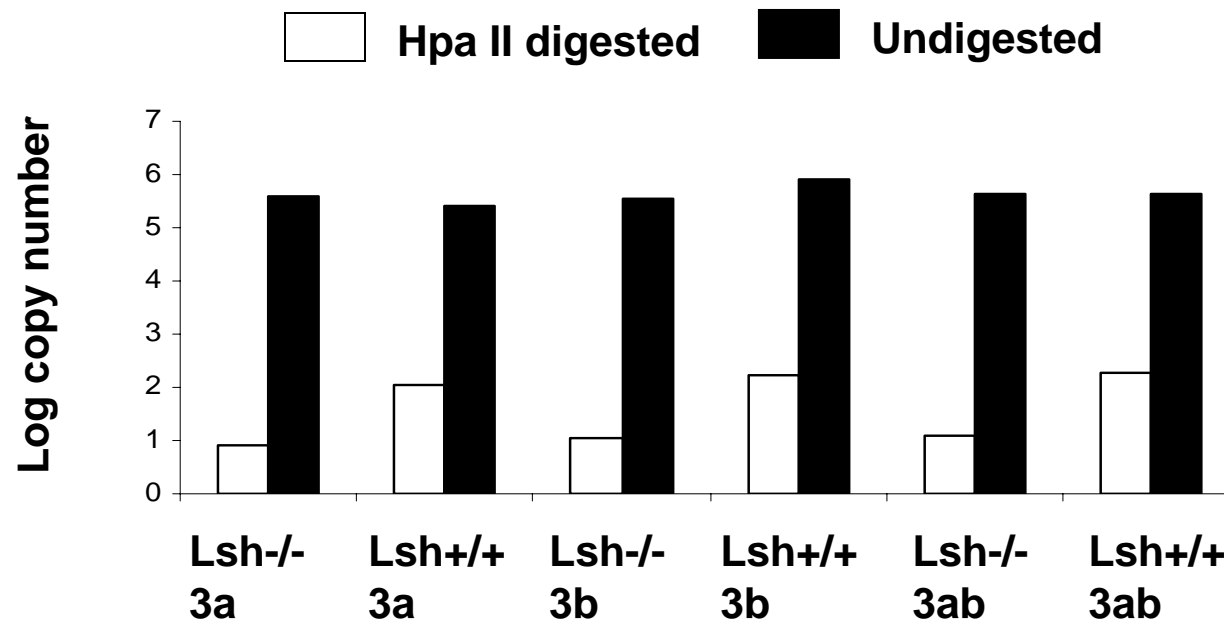

**Suppl. Fig. 2**

Supplement: 7600925s2.pdf [file 7600925s2.pdf]

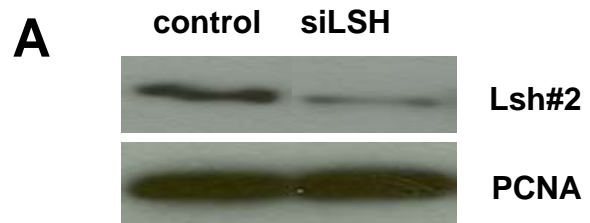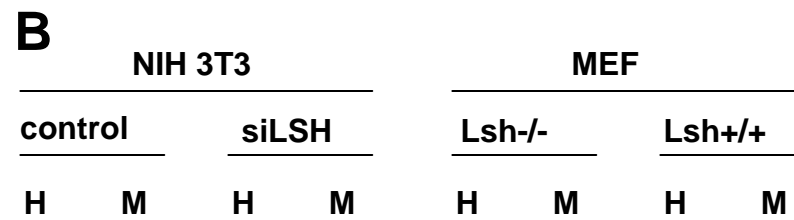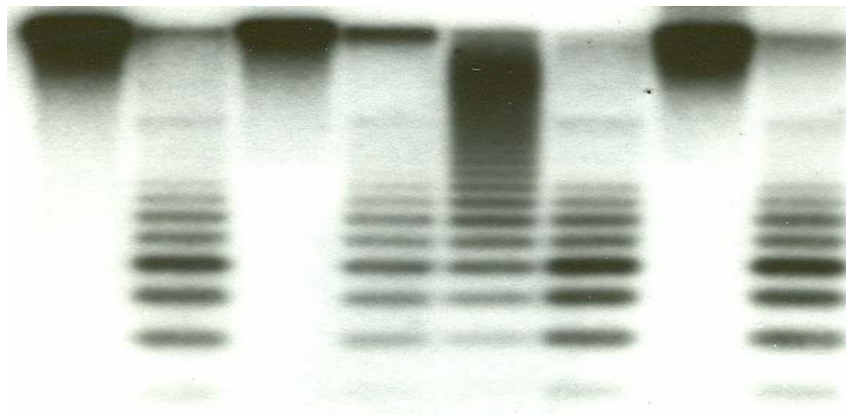

**Suppl. Fig. 3**

Supplement: 7600925s3.pdf [file 7600925s3.pdf]
